# Supplementary material for: New Inventories of Global Carbon Dioxide Emissions through Biomass Burning in 2001–2020
Source: MDPI journal article supplement (doi:10.3390/rs13101914), 2021-05-13
Supplement: s1 [file s1]

Archive with 1 entries (1 files):
- remotesensing-1161036-supplementary.pdf
