# Supplementary material for: New Inventories of Global Carbon Dioxide Emissions through Biomass Burning in 2001–2020
Source: MDPI journal article supplement (doi:10.3390/rs13101914), 2021-05-13
Supplement: s1 [file s1 › remotesensing-1161036-supplementary.pdf]

# Supplementary Materials for

New Inventories of Global Carbon Dioxide Emissions through Biomass Burning  
in 2001–2020

Tomohiro Shiraishi <sup>1,\*</sup>, Ryuichi Hirata <sup>1</sup> and Takashi Hirano <sup>2</sup>

<sup>1</sup> Center for Global Environmental Research, Earth System Division, National Institute for Environmental Studies, Tsukuba, Ibaraki 305-8506, Japan.

<sup>2</sup> Research Faculty of Agriculture, Hokkaido University, Sapporo, Hokkaido 060-8589, Japan.

\* Correspondence: shiraishi.tomohiro@nies.go.jp

## **This file includes:**

Figures: S1 and S3

Tables: S1 to S6

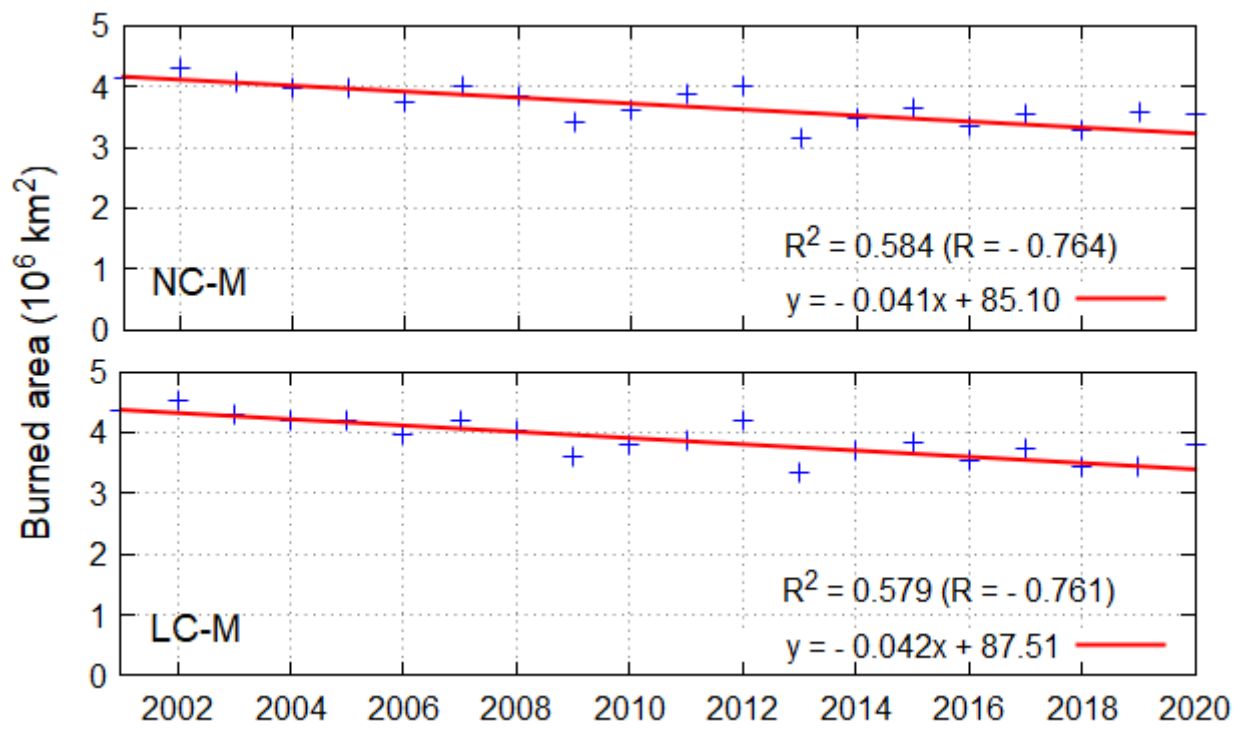

Figure S1. Global burned area trend for two fire distribution maps (NC-M and LC-M).  $R^2$  is the coefficient of determination.  $R$  is the correlation coefficient.

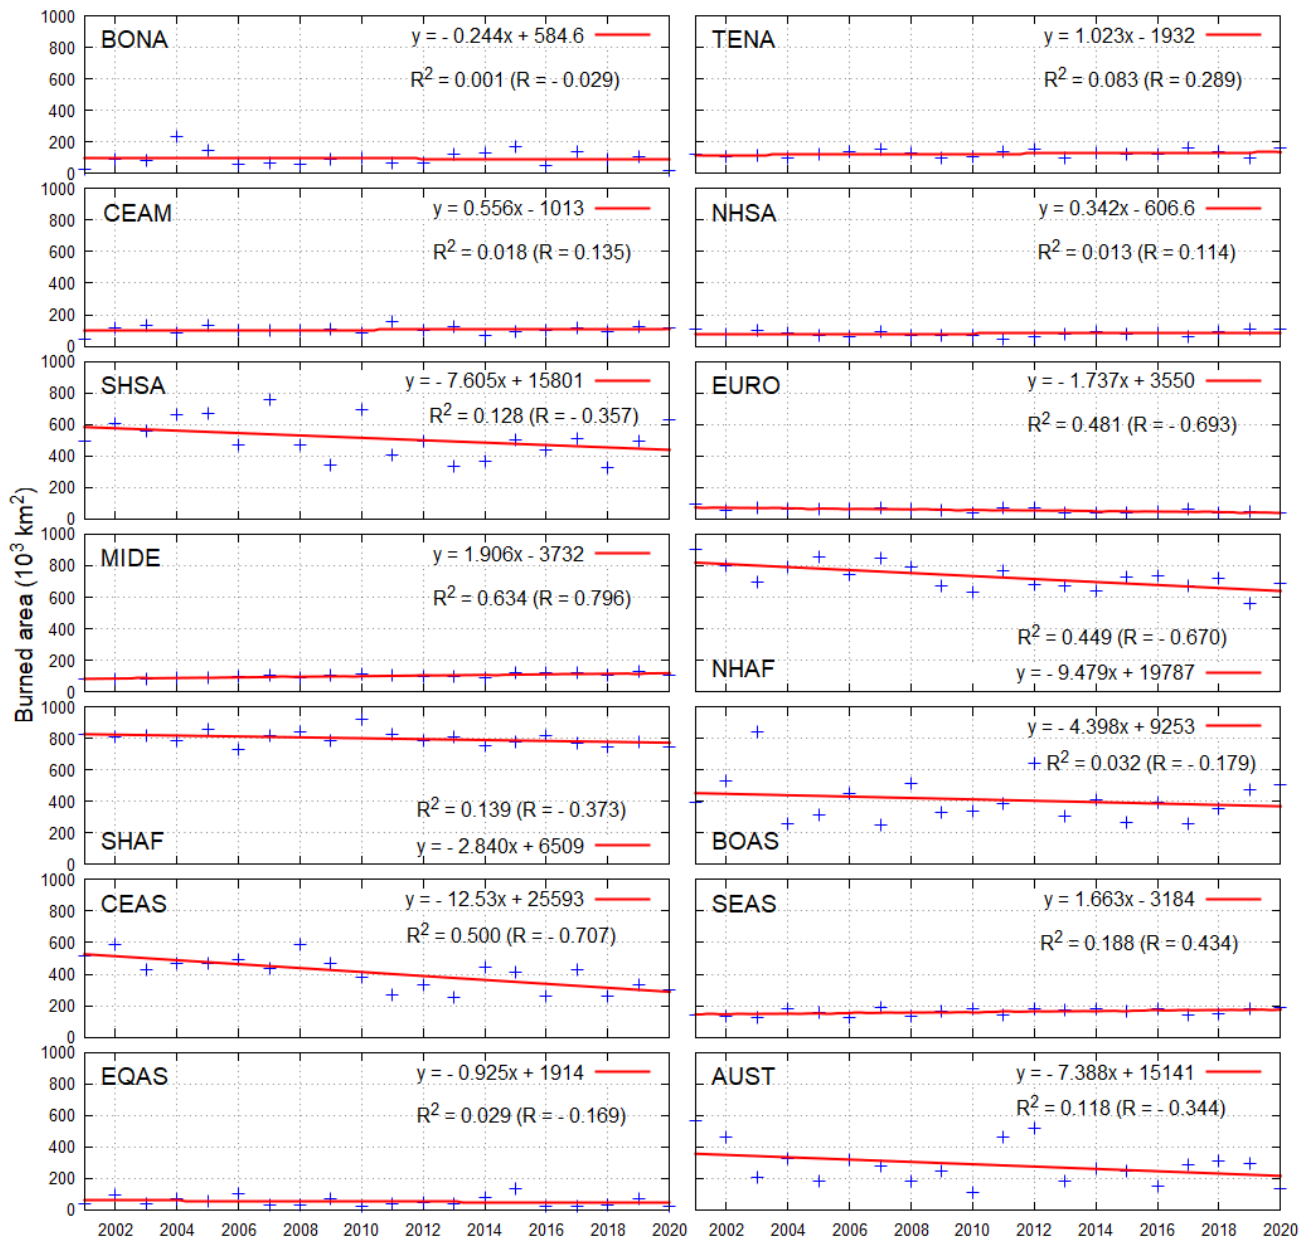

Figure S2. Regional burned area trend for LC-M.  $R^2$  is the coefficient of determination.  $R$  is the correlation coefficient.

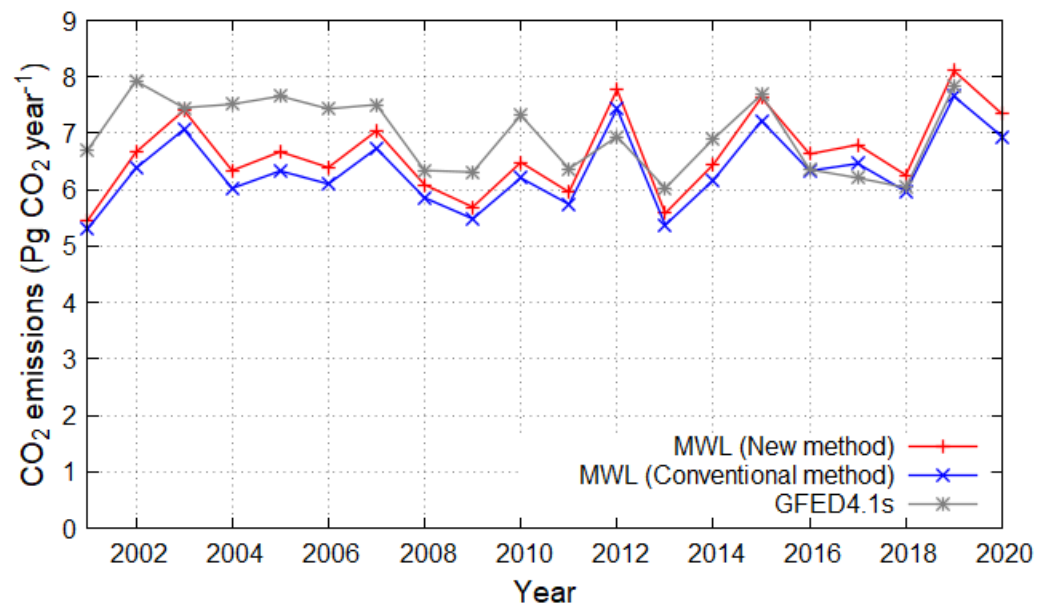

Figure S3. Comparison of the annual estimated CO<sub>2</sub> emissions for MWL inventory using new and conventional methods based on GFED4.1s. The inputs of MWL are MCD12Q1 for LCC, GEOCARBON for AGB, and LC-M for FD.

Table S1. Abbreviation list.

| Abbreviation    | Description                                                          |
|-----------------|----------------------------------------------------------------------|
| CO <sub>2</sub> | Carbon dioxide                                                       |
| CO              | Carbon monoxide                                                      |
| CH <sub>4</sub> | Methane                                                              |
| GFED            | The Global Fire Emissions Database                                   |
| CASA            | Carnegie Ames Stanford Approach                                      |
| GFAS            | The Global Fire Assimilation System                                  |
| FRP             | Fire radiative power                                                 |
| FINN            | The Fire Inventory from the National Center for Atmospheric Research |
| GICC            | Global Inventory for Chemistry-Climate studies                       |
| G-G             | The GICC-GFED4 Inventory                                             |
| MODIS           | Moderate Resolution Imaging Spectroradiometer                        |
| GLC2000         | The Global Land Cover 2000 Project                                   |
| EM              | CO <sub>2</sub> emission from fires (g CO <sub>2</sub> )             |
| BA              | Burned area (m <sup>2</sup> )                                        |
| BD              | Biomass density (kg m <sup>-2</sup> )                                |
| Agb             | Biomass density (kg m <sup>-2</sup> ) from above-ground biomass map  |
| BE              | Burning efficiency (0 to 1)                                          |
| EF              | Emission factor of dry matter (g CO <sub>2</sub> kg <sup>-1</sup> )  |
| ESA             | The European Space Agency                                            |
| FD              | Fire distribution                                                    |
| LCC             | Land cover classification                                            |
| AGB             | Above-ground biomass                                                 |
| HC-M            | Fire distribution map with 80% to 100% confidence level              |
| NC-M            | Fire distribution map with 30% to 100% confidence level              |
| LC-M            | Fire distribution map with 0% to 100% confidence level               |
| MWN             | Inventory was created from MCD12Q1, GEOCARBON, and NC-M              |
| MWL             | Inventory was created from MCD12Q1, GEOCARBON, and LC-M              |
| MEN             | Inventory was created from MCD12Q1, Globbiomass, and NC-M            |
| MEL             | Inventory was created from MCD12Q1, Globbiomass, and LC-M            |
| GWN             | Inventory was created from GLC2000, GEOCARBON, and NC-M              |
| GWL             | Inventory was created from GLC2000, GEOCARBON, and LC-M              |
| GEN             | Inventory was created from GLC2000, Globbiomass, and NC-M            |
| GEL             | Inventory was created from GLC2000, Globbiomass, and LC-M            |

|      |                                   |
|------|-----------------------------------|
| BONA | Boreal North America              |
| TENA | Temperate North America           |
| CEAM | Central America                   |
| NHSA | Northern Hemisphere South America |
| SHSA | Southern Hemisphere South America |
| EURO | Europe                            |
| MIDE | Middle East                       |
| NHAF | Northern Hemisphere Africa        |
| SHAF | Southern Hemisphere Africa        |
| BOAS | Boreal Asia                       |
| CEAS | Central Asia                      |
| SEAS | Southeast Asia                    |
| EQAS | Equatorial Asia                   |
| AUST | Australia and New Zealand         |

Table S2. Burning efficiency (BE) and emission factors (EF) for forest (F) and non-forest (NF) in GLC2000 and MCD12Q1 from Mievilte et al. (2010) [25] and Shi et al. (2015) [26]. The characters in parentheses following the NF category represent shrub (S), cropland (C), and others (O) classification categories for the evaluation.

| Land cover categories |                                                              |         |                                         | BE   | EF<br>(g CO <sub>2</sub> kg <sup>-1</sup> ) |
|-----------------------|--------------------------------------------------------------|---------|-----------------------------------------|------|---------------------------------------------|
| GLC2000               |                                                              | MCD12Q1 |                                         |      |                                             |
| F/NF                  | Type                                                         | F/NF    | Type                                    |      |                                             |
| F                     | Tree Cover, broadleaved, evergreen                           | F       | Evergreen Broadleaf Forests             | 0.25 | 1580                                        |
| F                     | Tree Cover, broadleaved, deciduous, closed                   | F       | Deciduous Broadleaf Forests             | 0.25 | 1569                                        |
| F                     | Tree Cover, broadleaved, deciduous, open                     |         | -                                       | 0.4  | 1613                                        |
| F                     | Tree Cover, needle-leaved, evergreen                         | F       | Evergreen Needleleaf Forests            | 0.25 | 1569                                        |
| F                     | Tree Cover, needle-leaved, deciduous                         | F       | Deciduous Needleleaf Forests            | 0.25 | 1569                                        |
| F                     | Tree Cover, mixed leaf type                                  | F       | Mixed Forests                           | 0.25 | 1569                                        |
| NF(O)                 | Tree Cover, regularly flooded, fresh water                   | NF(O)   | Permanent Wetlands                      | 0    | 0                                           |
| NF(O)                 | Tree Cover, regularly flooded, saline water                  |         | -                                       | 0    | 0                                           |
| F                     | Mosaic: Tree Cover,<br>Other natural vegetation              | F       | Savannas,<br>Woody Savannas             | 0.35 | 1591                                        |
| NF(O)                 | Tree Cover, burned                                           |         | -                                       | 0    | 0                                           |
| NF(S)                 | Shrub Cover, closed-open, evergreen                          | NF(S)   | Open, Close Shrublands                  | 0.9  | 1613                                        |
| NF(S)                 | Shrub Cover, closed-open, deciduous                          |         | -                                       | 0.4  | 1613                                        |
| NF(S)                 | Herbaceous Cover, closed-open                                |         | -                                       | 0.9  | 1613                                        |
| NF(S)                 | Sparse herbaceous or sparse shrub cover                      |         | -                                       | 0.6  | 1567                                        |
| NF(O)                 | Regularly flooded shrub and/or herbaceous cover              |         | -                                       | 0    | 0                                           |
| NF(C)                 | Cultivated and managed areas                                 |         | -                                       | 0.6  | 1515                                        |
| NF(C)                 | Mosaic: Cropland,<br>Tree Cover,<br>Other natural vegetation | NF(C)   | Cropland,<br>Natural Vegetation Mosaics | 0.8  | 1594                                        |
| NF(C)                 | Mosaic: Cropland,<br>Shrub and/or grass cover                | NF(C)   | Grasslands                              | 0.75 | 1580                                        |
| NF(O)                 | Bare Areas                                                   | NF(O)   | Barren                                  | 0    | 0                                           |
| NF(O)                 | Water Bodies                                                 | NF(O)   | Water Bodies                            | 0    | 0                                           |
| NF(O)                 | Snow and Ice                                                 | NF(O)   | Permanent Snow and Ice                  | 0    | 0                                           |
| NF(O)                 | Artificial surfaces and associated areas                     | NF(O)   | Urban and Built-up Lands                | 0    | 0                                           |
| NF(O)                 | No data                                                      |         | -                                       | 0    | 0                                           |

Table S3. Emission factors (EF) for CO based on MCD12Q1 from van der Werf et al. (2017) [6].

[illegible]

[illegible]

Table S5. Averages of annual CO emissions for the CO inventories of the United States Environmental Protection Agency and our eight results in temperate North America from 2001 to 2020.

| <b>Inventory</b>                 | <b>Average<br/>(Tg CO year<sup>-1</sup>)</b> | <b>1 standard deviation<br/>(Tg CO year<sup>-1</sup>)</b> |
|----------------------------------|----------------------------------------------|-----------------------------------------------------------|
| EPA                              | 12.9                                         | 3.86                                                      |
| MWN                              | 15.8                                         | 4.73                                                      |
| MWL                              | 16.5                                         | 4.90                                                      |
| MEN                              | 24.8                                         | 4.97                                                      |
| MEL                              | 25.9                                         | 5.15                                                      |
| GWN                              | 10.0                                         | 3.31                                                      |
| GWL                              | 10.5                                         | 3.45                                                      |
| GEN                              | 17.9                                         | 3.67                                                      |
| GEL                              | 18.7                                         | 3.83                                                      |
| Average of our eight inventories | 17.5                                         | 4.19                                                      |

Table S6. Comparison of the average biomass density for the collected categories in each combination of LCC and AGB maps. The collected categories, which are “Forest” and “Non-forest” (Shrub, Cropland), are classified in Table S2.

| Category   |          | Average biomass density (kg m <sup>-2</sup> ) |             |           |             |
|------------|----------|-----------------------------------------------|-------------|-----------|-------------|
|            |          | MCD12Q1                                       |             | GLC2000   |             |
|            |          | GEOCARBON                                     | Globbiomass | GEOCARBON | Globbiomass |
| Forest     |          | 7.22                                          | 10.5        | 7.51      | 9.07        |
| Non-forest | Shrub    | 0.32                                          | 0.23        | 0.09      | 0.52        |
|            | Cropland | 0.69                                          | 0.86        | 0.17      | 2.36        |
